# Supplementary material for: Overexpression of small-conductance Ca2+-activated K+ channel 2 attenuates pain-like behavior in female mice with cystitis
Source: JCI journal article supplement (doi:10.1172/jci.insight.199567), 2026-05-22
Supplement: sd1 [file 1]

## Supplemental material

**Supplemental Figure 1. Overexpression of *Kcnn2* in transgenic SK2 mice.** Fluorescence *in situ* hybridization (FISH) confirms higher *Kcnn2* expression in *Calca*<sup>+</sup> DRG neurons of SK2<sup>+T</sup> mice than control littermates (WT). No signal was visible with the negative control probe (not shown). **(A)** Confocal images of DRG are shown. FISH was performed with probes for *Kcnn2* and *Calca*. Insets, 4-fold magnification of *Calca*<sup>+</sup> neurons. **(B)** Quantification of *Kcnn2* expression in *Calca*<sup>+</sup> neurons. The fraction area of each *Calca*<sup>+</sup> neuron occupied by *Kcnn2* clusters is shown. Data are shown as the mean ± SEM (WT, 94 cells from 3 mice; SK2<sup>+T</sup>, 79 cells from 3 mice; Mann-Whitney test, \* p<0.001).

**Supplemental Figure 2. Cyclophosphamide treatment does not alter *Kcnn2* expression in smooth muscle cells or bladder sensory neurons.** Wild type (WT) mice received saline (SAL) or cyclophosphamide (CYP) every other day for a week. **(A-D)** Cluster analysis using CellProfiler. **(A)** Confocal images of the DRG are shown. Immuno fluorescence *in situ* hybridization (immuno-FISH) was performed in fresh frozen sections of DRG (L6-S2) harvested from mice injected into the bladder wall with cholera toxin β subunit (CTb). A goat antibody anti-CTb and a secondary donkey anti-goat conjugated with AlexaFluor™ 594 were used to identify bladder sensory neurons (red). **(B)** Identification of CTb-labeled neurons using CellProfiler. **(C)** Detection of *Kcnn2* clusters in sensory neurons. **(D)** 4-fold magnification of the identified neuron in box and detected clusters. **(E)** Quantification of *Kcnn2* expression in CTb-labeled bladder sensory neurons of WT mice treated with SAL or CYP. The fraction area of CTb-labeled neurons occupied by *Kcnn2* clusters is shown. Data are shown as the mean ± SEM (SAL, 73 cells from 3 mice; CYP, 66 cells from 3 mice; not statistically significant) **(F)** Quantification of *Kcnn2* expression in bladder muscularis externa of WT mice treated with SAL or CYP. The fraction area of the muscularis externa occupied

by *Kcnn2* clusters is shown. Data are shown as the mean  $\pm$  SEM (SAL, n=3; CYP, n=3; not statistically significant).

**Supplemental Figure 3. *Kcnn2* is not expressed in skeletal muscle.** (A) Fluorescence *in situ* hybridization (FISH) was performed on cryosections of abdominal skeletal muscle from SK2<sup>+T</sup> and wild type (WT) littermate mice. FISH was performed with probes for *Kcnn2* and *Kccn1a*, which encodes the pore forming subunit of the large conductance calcium-activated K<sup>+</sup> channel. Inset, 4-fold magnification of the skeletal muscle. No signal was visible with the negative control probe (not shown). (B) Confocal images of the urinary bladder from SK2<sup>+T</sup> and WT littermate mice are shown. FISH was performed with probes for *Kcnn2* and *Acta2*. *Acta2* is highly expressed in smooth muscle cells. Inset, 4-fold magnification of the muscularis externa. Representative of two experiments.

**Supplemental Figure 4. Measurement of afferent nerve activity and determination of baseline using tetrodotoxin.** Representative recording of intravesical pressure, raw nerve activity and afferent discharge from a bladder of a transgenic SK2 (SK2<sup>+T</sup>) mouse injected with saline. The urinary bladder was infused at a rate of 15  $\mu$ l.min<sup>-1</sup> until the intravesical pressure reached 40 cmH<sub>2</sub>O. Bladder infusion initiation is denoted by a red arrow. At the end of the experiment tetrodotoxin (TTX, 1  $\mu$ M) was perfused through the chamber and an additional filling cycle at a rate of 130  $\mu$ l.min<sup>-1</sup> was conducted to confirm inhibition of nerve activity.

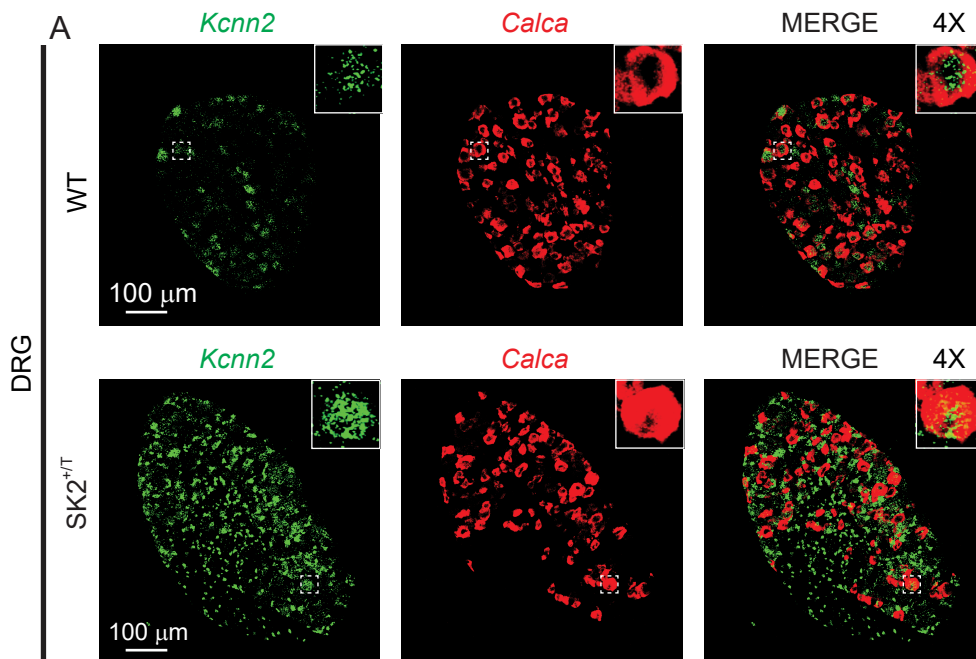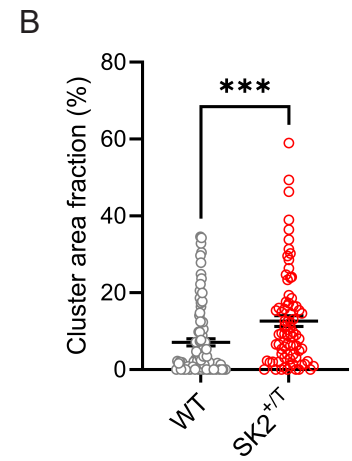

Supplemental Figure 1.

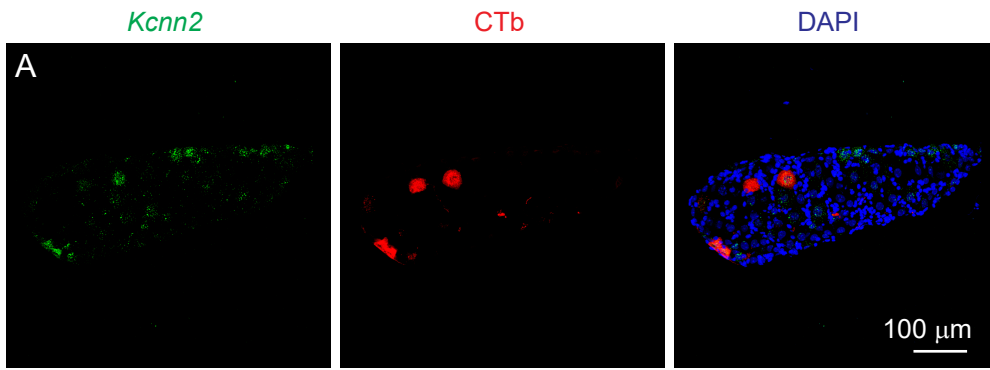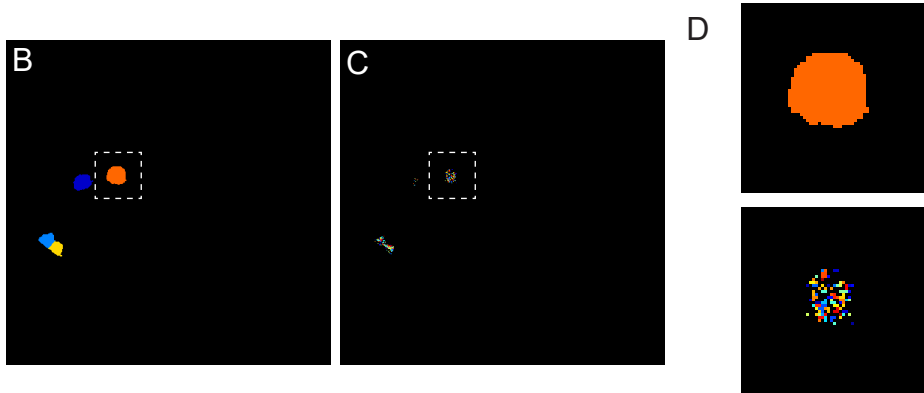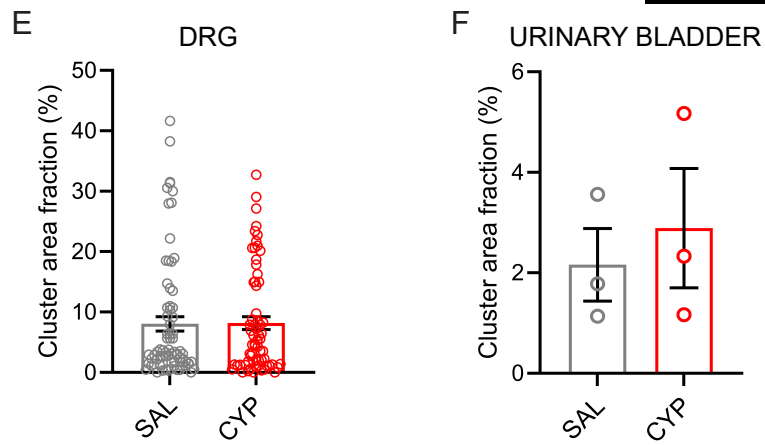

Supplemental Figure 2.

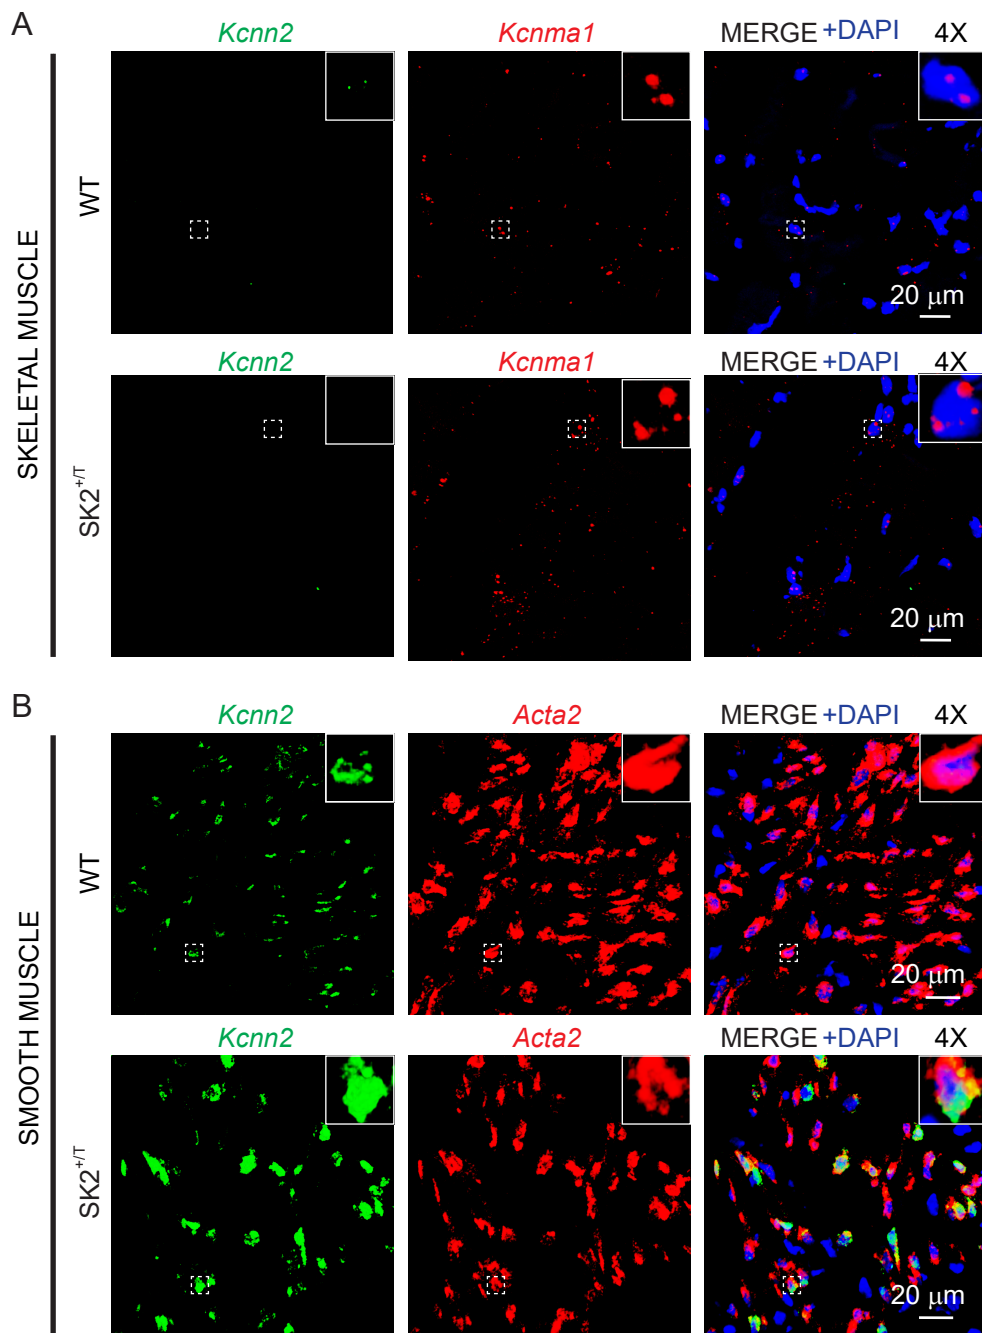

Supplemental Figure 3.

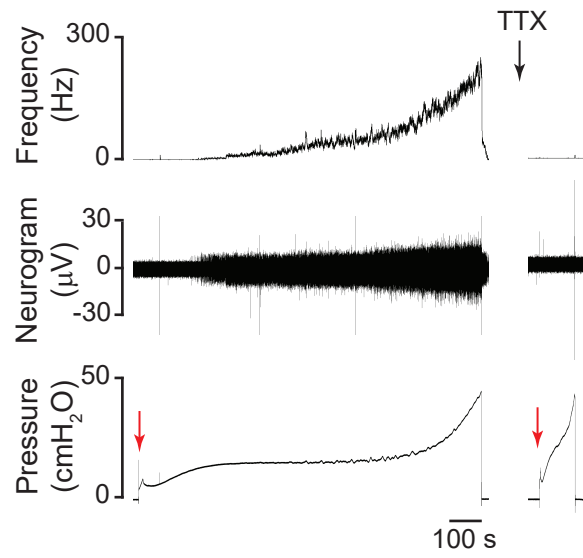

Supplemental Figure 4.
